# Supplementary material for: Relationship of Maize Yield to Climatic and Environmental Factors under Deficit Irrigation: A Quantitative Review
Source: Hindawi journal article supplement (doi:10.1155/2022/2408439), 2022-11-18
Supplement: f1 [file 2408439.f1.docx]

Supplementary Materials A, Table S1: Characteristics of the studies included in the review.

| S/N | Authors of Studies | Sites/Countries | Growth Stages | Number of treatments per growth stage | Data collected | Experimental design | Cultivar Name; cycle (days) |
| --- | --- | --- | --- | --- | --- | --- | --- |
| 1 | Aguilar et al., 2007 | Seville/Spain | R | 8 | WS, GY, IWUE, Cult_cycle | Randomized Comlete Block Design (RCBD) | Short; 150 |
| Medium; 150 |
| Long;150 |
| 2 | Bennett et al., 1989 | Faisalabad/ Florida | V | 4 | WS, GY, Cult_cycle | Split plot design | McCurdy 84AA maize; 125 |
| 3 | Çakir, 2004 | Kirklareli/Turkey | V | 3 | WS, GY, IWUE, Cult_cycle | RCBD | Pioneer_brand_3377; 125 |
| R | 18 |
| V&R | 10 |
| 4 | Di Paolo and Rinaldi, 2008 | Chieti/Italy | R | 4 | WS, GY, Cult_cycle | Split plot | corn hybrid Tevere; 130 |
| 5 | Doto. et al., 2015 | Kongoussi/Burkina Faso | R | 2 | WS, GY, IWUE, Cult_cycle | RCBD | Barka; 80 |
| 6 | Eck, 1984 | Bushland/ Texas | V | 16 | WS, GY, IWUE, Cult_cycle | Randomized bloc with split plot | Pioneer 3184; 120 |
| 7 | Ertek and Kara, 2013 | Isparta Province/ Turkey | V&R | 2 | WS, GY, IWUE, Cult_cycle | RCBD | Lumina F1; Na |
| 8 | Farré and Faci, 2009 | Zaragoza/Spain | V | 2 | WS, GY, IWUE, Cult_cycle | Randomized bloc | Prisma; 125 |
| R | 4 |
| V&R | 2 |
| 9 | Gouranga and Harsh, 2005 | Dhenkanal/Asia | V | 3 | GY, Cult_cycle | Split plot | Lalat; 120 |
| **RS** | 2 |
| **VRS** | 3 |
| 10 | Hammad. et al., 2012 | Faisalabad/Asia | **VRS** | 4 | IW, GY, IWUE, Cult_cycle | Split plot with RCBD | Pioneer 31-R-88; 105 |
| 11 | Huang et al., 2002 | Loess Plateau/China | **VRS** | 5 | IW, GY, IWUE, Cult_cycle | Randomized bloc design | NA; 150 |
| 12 | Kirda et al., 2005 | Adana/ Turkey | **VRS** | 4 | IW, GY, IWUE, Cult_cycle | Complete randomized bloc design | Sele; 120 |
| 13 | Kusçu and Osman, 2012 | Marmara/Turkey | **VS** | 3 | IW, GY, IWUE, Cult_cycle | RCBD | PR31P41; 120 |
| **RS** | 5 |
| **VRS** | 3 |
| 14 | Mansouri-Far et al., 2010 | Kermanshah/Iran | **VS** | 2 | IW, GY, IWUE, Cult_cycle | RCBD | S.C647;120 |
| **RS** | 2 | T.C647; 120 |
| **VRS** | 2 |  |
| Tehran/Iran | **VS** | 2 | IW, GY, IWUE, Cult_cycle |  | S.C647;120 |
| **RS** | 2 | T.C647; 120 |
| **VRS** | 2 |  |
| 15 | Ayana, 2011 | Arba Minch State/ Ethiopia | **VS** | 3 | IW, GY, IWUE, Cult_cycle | RCBD | RH-240; 135 |
| **RS** | 2 |
| **VRS** | 2 |
| 16 | NeSmith and Ritchie, 1992 | Kalamazoo/USA | **RS** | 2 | IW, GY, IWUE, Cult_cycle | Complete randomized bloc design | Hybrid Great Lakes 599; 100 |
| 17 | Osborne et al., 2002 | Shelton/Nebraska | **VRS** | 5 | IW, GY, IWUE, Cult_cycle, N_rate | Split plot | Pioneer brand hybrid 3489; 90 |
| 18 | Pandey et al., 2000 | Konni/Niger | **VS** | 3 | IW, GY, IWUE, Cult_cycle | Split plot | P3Kollo; 100 |
| **VRS** | 5 |
|  |  |
| 19 | Payero, et al., 2009 | North Platte/ Nebraska | **RS** | 8 | IW, GY, IWUE, Cult_cycle | RCBD | Hybrid Kaytar KX-8615Bt; 112 |

**VS**= Vegetative stage; **RS**=Reproductive stage; **VRS**= Vegetative and reproductive stage; IW: irrigation water for water stressed and optimal treatments; GY = Grain yield, IWUE = Irrigation water use efficiency; Cult_cycle = Cultivar cycle. Complete references of selected studies are provided in Supplementary materials C

Supplementary Material B, Table S2: Maize growth stage based on FAO classification [59]

|  | Growth Stages | Codes |
| --- | --- | --- |
| Emergence | Seedling stage | VE |
|  |
| Vegetative stage (VS)* | Vegetative; early vegetative stage | V |
|  | 1-Leaf to 11-leaf | V1 to V11 |
|  | 2-Leaf | V2 |
|  | 3-Leaf | V3 |
|  | 4-Leaf | V4 |
|  | 5-Leaf | V5 |
|  | 6-Leaf | V6; |
|  | 7-Leaf | V7 |
|  | 8-Leaf | V8 |
|  | 9-Leaf | V9 |
|  | 10-Leaf | V10 |
|  | 11-Leaf | V11 |
|  | 12-Leaf | V12 |
|  | 14-Leaf | V14 |
|  | 18-Leaf | V18 |
| Reproductive stage (RS)* | Tassel (ling); tassel initiation | VT |
|  | Silking | R1 |
|  | Cob (ear) formation | C |
|  | Blister Kernel | R2 |
|  | Milking, early grain filling | R3 |
|  | Dough | R4 |
|  | Beginning dent/Full dent | R4.7/R5.5 |
| Physiological Maturity | From milk stage to physiological maturity |  |
|  | Physiological Maturity/Maturity | R6 |

* Represents individual growth stages (vegetative or reproductive stages) where irrigation water was reduced. A third case is considered, whereby water is withheld simultaneously at both vegetative and reproductive stages. The codes are as provided by the FAO classification system of maize growth stages.

Supplementary Material C: List of selected studies

| **Selected Studies** |
| --- |
| Aguilar M., Borjas F., Espinosa M., 2007. Agronomic response of maize to limited levels of water under furrow irrigation in southern Spain, *Spanish Journal of Agricultural Research*, 2007 5(4), 587-592 |
| Ayana, M., 2011. Deficit irrigation practices as alternative means of improving water use efficiencies in irrigated agriculture: Case study of maize crop at Arba Minch, Ethiopia. *African Journal of Agricultural Research*, 6, 10. <https://doi.org/10.5897/AJAR09.118> |
| Bennett, J.M., Mutti, L.S.M., Rao, P.S.C., Jones, J.W., 1989. Interactive effects of nitrogen and water stresses on biomass accumulation, nitrogen uptake, and seed yield of maize. *Field Crops Research*, 19, 297–311. <https://doi.org/10.1016/0378-4290(89)90100-7> |
| Çakir, R., 2004. Effect of water stress at different development stages on vegetative and reproductive growth of corn. *Field Crops Research*, 89, 1–16. <https://doi.org/10.1016/j.fcr.2004.01.005> |
| Di Paolo, E., Rinaldi, M., 2008. Yield response of corn to irrigation and nitrogen fertilization in a Mediterranean environment. *Field Crops Research*, 105, 202–210. <https://doi.org/10.1016/j.fcr.2007.10.004> |
| Doto V.C., Yacouba H., Niang D., Lahmar R., Agbossou E.K., 2015. Mitigation effect of dry spells in Sahelian rainfed agriculture: Case Study of Supplemental irrigation in Burkina-Faso.*Afr. J. Agric. Res*., 10 (16), 1863-1873, <https://doi.org/10.5897/AJAR2015.9639> |
| Eck, H.V., 1984. Irrigated Corn Yield Response to Nitrogen and Water 1. *Agronomy Journal,* 76, 421–428. <https://doi.org/10.2134/agronj1984.00021962007600030014x> |
| Ertek A., Kara B., 2013. Yield and quality of sweet corn under deficit irrigation. *Agricultural water management*, 129, 138-144. http://dx.doi.org/10.1016/j.agwat.2013.07.012 |
| Farré I., Faci J.-M., 2009. Deficit irrigation in maize for reducing agricultural water use in a Mediterranean environment. *Agricultural water management* 96, 383-394. https://doi.org/10.1016/j.agwat.2008.07.002 |
| Hammad, H.M., Ahmad, A., Abbas, F., Farhad, W., 2012. Optimizing water and nitrogen use for maize production under semiarid conditions. *Turk J Agric For,* 36, 519–532. <https://doi.org/10.3906/tar-1111-24> |
| Huang M., Zhong L., Gallichand J., 2002. Irrigation Treatments for corn with limited water supply in the Loess Plateau, China. *Canadian Biosystems engineering*, 44 (1), 29:34 |
| Kar G. and Verma H.N., 2005. Phenology based irrigation scheduling and determination of crop coefficient of winter maize in rice fallow of eastern India.*Agricultural water management,* 75, 169-183. https://doi.org/10.1016/j.agwat.2005.01.002 |
| Kirda C., Topcu S., Kaman H., Ulger A.C., Yazici A., Cetin M., Derici M.R., 2005. Grain yield response and N-fertilizer recovery of maize under deficit irrigation. *Field Crops Research,* 93, 132-141. https://doi.org/10.1016/j.fcr.2004.09.015 |
| Kuşçu, H., Demir, A.O., 2012. Responses of Maize to Full and Limited Irrigation at Different Plant Growth Stages. |
| Mansouri-Far, C., Modarres Sanavy, S.A.M., Saberali, S.F., 2010. Maize yield response to deficit irrigation during low-sensitive growth stages and nitrogen rate under semi-arid climatic conditions. *Agricultural Water Management*, 97, 12–22. <https://doi.org/10.1016/j.agwat.2009.08.003> |
| NeSmith D.S., Ritchie J.T., 1992. Effects of soil water-deficits during tassel emergence on development and yield component of maize (*Zea mays*). *Field Crops Research*, 28 (1992), 251-256. |
| Osborne S.L., Schepers J.S., Francis D.D., Schlemmer M.R., 2002. Use of spectral radiance to estimate In-Season biomass and grain yield in nitrogen and water-stressed corn. *Crop Sci*. 42: 165-171 |
| Pandey, R.K., Maranville, J.W., Chetima, M.M., 2000. Deficit irrigation and nitrogen effects on maize in a Sahelian environment II. Shoot growth, nitrogen uptake and water extraction. *Agricultural Water Management,* 46 (2000), 1-13 |
| Payero J.O., Tarkalson D.D., Irmak S., Davison D., Petersen J.L., 2009. Effect of timing of a deﬁcit-irrigation allocation on corn evapotranspiration, yield, water use efﬁciency and dry mass. *Agricultural Water Management*, 96, 1387-1397. https://doi.org/10.1016/j.agwat.2009.03.022 |
